# Supplementary material for: The Stereotypic Response of the Pulmonary Vasculature to Respiratory Viral Infections: Findings in Mouse Models of SARS-CoV-2, Influenza A and Gammaherpesvirus Infections
Source: Viruses. 2023 Jul 27;15(8):1637. doi: 10.3390/v15081637 (PMC10458810; doi:10.3390/v15081637)
Supplement: Supplementary file 1 [file viruses-15-01637-s001.zip]

Archive with 5 entries (5 files):
- Supplementary Figure S1 Assembled flat.tif
- Supplementary Figure S2 Assembled flat.tif
- Supplementary Material.pdf
- Supplementary-data-1.xlsx
- Supplementary-data-2.xlsx
